# Supplementary material
Source: HighWire-hosted journal article supplement (https://heart.bmj.com/content/heartjnl-2020-317870)
Supplement: inline-supplementary-material-1 [file inline-supplementary-material-1.pdf]

**Supplementary Table 1. Data items in data request form sent to hospitals for weekly counts**

| Category                              | Presentation /diagnosis /treatment /procedure       | Suggested A&E Diagnosis /ICD-10 /OPCS-4 codes                                                                                          | Please note if alternative codes/method used |
|---------------------------------------|-----------------------------------------------------|----------------------------------------------------------------------------------------------------------------------------------------|----------------------------------------------|
| <b>Emergency department visits</b>    | Total ED visits                                     |                                                                                                                                        |                                              |
|                                       | Cardiac conditions                                  | A&E Diagnosis code <sup>1</sup> : 20                                                                                                   |                                              |
|                                       | Cerebrovascular conditions                          | A&E Diagnosis code <sup>1</sup> : 21                                                                                                   |                                              |
|                                       | Other vascular conditions                           | A&E Diagnosis code <sup>1</sup> : 22                                                                                                   |                                              |
| <b>Hospital admissions</b>            | Total admissions                                    |                                                                                                                                        |                                              |
|                                       | Total COVID admissions                              | ICD-10 <sup>2</sup> : U07.1, U07.2                                                                                                     |                                              |
|                                       | Acute coronary syndromes                            | ICD-10 <sup>2</sup> : I21, I22, I24                                                                                                    |                                              |
|                                       | Heart failure                                       | ICD-10 <sup>2</sup> : I50                                                                                                              |                                              |
|                                       | Acute stroke/TIA                                    | ICD-10 <sup>2</sup> : I60, I61, I63, I64, G45                                                                                          |                                              |
|                                       | DVT or PE                                           | ICD-10 <sup>2</sup> : I26, I80                                                                                                         |                                              |
|                                       | Peripheral arterial disease                         | ICD-10 <sup>2</sup> : I70, I73, I74, I77                                                                                               |                                              |
|                                       | Aortic aneurysms                                    | ICD-10 <sup>2</sup> : I71                                                                                                              |                                              |
| <b>Hospital treatments/procedures</b> | Percutaneous coronary intervention                  | OPCS-4 <sup>3</sup> : K49, K50, K75                                                                                                    |                                              |
|                                       | CABG                                                | OPCS-4 <sup>3</sup> : K40-K44                                                                                                          |                                              |
|                                       | Cardiac resynchronisation therapy                   | OPCS-4 <sup>3</sup> : K59                                                                                                              |                                              |
|                                       | Cardiac pacemaker procedures                        | OPCS-4 <sup>3</sup> : K60                                                                                                              |                                              |
|                                       | Intravenous thrombolysis for acute ischaemic stroke | OPCS-4 <sup>3</sup> : X83.3 and ICD-10 <sup>2</sup> : I63                                                                              |                                              |
|                                       | Mechanical thrombectomy for acute ischaemic stroke  | OPCS-4 version 4.9 <sup>3</sup> : L35.4<br>OR<br>OPCS-4 version 4.8 <sup>3</sup> : L71.2 and Y53 and Z35 and ICD-10 <sup>2</sup> : I63 |                                              |
|                                       | Cerebral aneurysm coiling procedures                | OPCS-4 <sup>3</sup> : O01-O04 and Y53 and Z35                                                                                          |                                              |
|                                       | Carotid endarterectomy / stenting                   | OPCS-4 <sup>3</sup> : L29.4, L29.5, L31.4                                                                                              |                                              |
|                                       | Peripheral angioplasty                              | OPCS-4 <sup>3</sup> : L54-71                                                                                                           |                                              |
|                                       | Limb revascularisation, bypass or amputation        | Bypass OPCS-4: L16-65;<br>Amputation OPCS-4: X09, X10, X11;<br>Revascularisation: L48-L54; L56-L63                                     |                                              |
|                                       | Aortic aneurysm repair                              | L18-L23; L25-L28                                                                                                                       |                                              |

**Supplementary Table 2. Percentage reduction in hospital admissions and ED attendances during the Christmas and New Year period\***

|                     | <b>% reduction 2018-2019<br/>(95% CI)</b> | <b>% reduction 2019-2020<br/>(95% CI)</b> | <b>% reduction pooled across<br/>both years (95% CI)</b> |
|---------------------|-------------------------------------------|-------------------------------------------|----------------------------------------------------------|
| Hospital admissions | 11.2 (10.7-11.8)                          | 13.0 (12.4-13.6)                          | 12.1 (11.7-12.6)                                         |
| ED attendances      | 4.0 (3.7-4.4)                             | 8.0 (7.6-8.4)                             | 6.1 (5.8-6.4)                                            |

\* comparing the period 16 December 2019 to 12 January 2020 to the immediately preceding period 18 November to 15 December 2019 (and equivalent weeks for the previous year)

**Supplementary Figure 1.** Relative change in hospital activities compared to before first case of COVID-19 across individual hospitals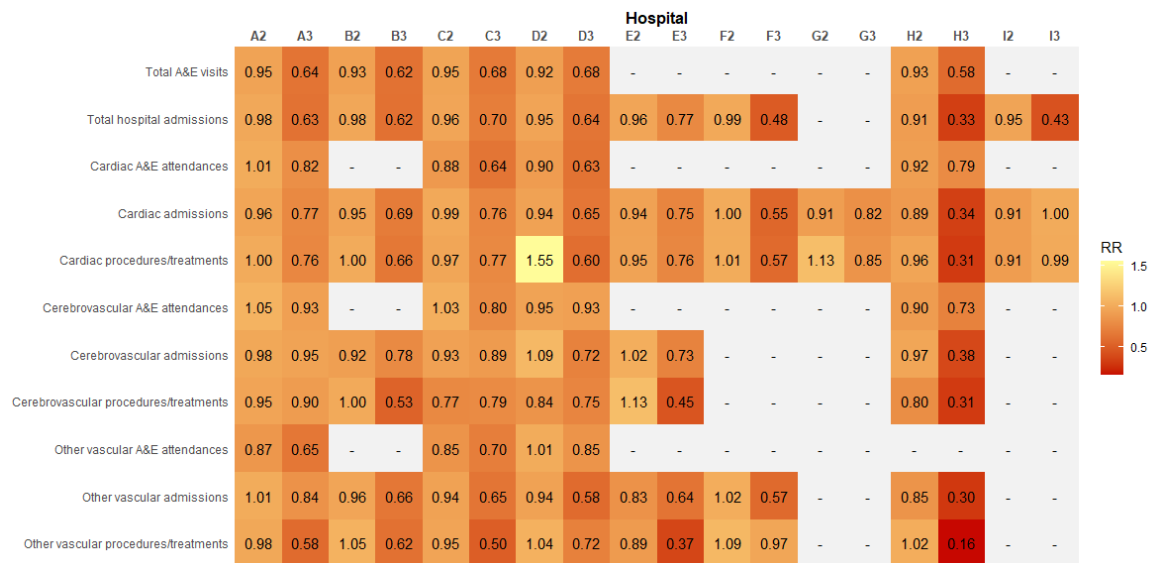

Hospitals are represented as A to I with affix referring to the phase: 2 = between first case and lockdown; 3 = after lockdown.
